# Supplementary material
Source: publisher figshare collection journal article supplement (https://tandf.figshare.com/ndownloader/files/15519236)
Supplement: Supplementary file 1 [file 15519236]

**Supplemental Materials and Methods**

**GABARAPs and LC3s have opposite roles in regulating ULK1 for autophagy induction**

**Douglas S. Grunwald, Neil Michael Otto, Ji-Man Park, Daihyun Song, and Do-Hyung Kim**

**Supplemental Figures and Tables**

**Figure S1**. Members within GABARAP and LC3 subfamilies have redundant functions in regulating ULK1 activity.

**Figure S2**. GABARAPs are important for ULK1 puncta formation during starvation.

**Figure S3**. Confirmation of ULK1 LIR genomic mutation and demonstration that ATG8 binding to ULK1 is not required for ULK1-ATG13 or ATG13-ATG14 interactions.

**Figure S4.** ATG8 binding to ULK1 is important for starvation-induced ULK1 puncta formation.

**Figure S5.** ATG8 binding to ATG13, but not RB1CC1, is important for autophagy.

**Table S1.** gRNA sequences for CRISPR-cas9 constructs to generate KO cells and LIR mutations

**Table S2.** TALEN target sequences to generate KO cells

**Table S3.** Primers for genotype screening of LIR mutations

**Table S4.** Primers to amplify mutagenized regions to clone into pRK5 for sequencing

**Table S5.** Primers for qPCR analysis of GABARAP gene expression

**Table S6.** Primers for site-directed mutagenesis of ATG13 LIR

**Supplemental Figures**

**Figure S1**

**­­­**

**Figure S1.** Members within GABARAP and LC3 subfamilies have redundant functions in regulating ULK1 activity. (**A**) ULK1 activity in ATG8-depleted cells after prolonged starvation. The indicated KO HeLa cells were cultured in full medium or starved with EBSS for 1 or 6 h. Phosphorylation of ATG14 at Ser29 was used to assess ULK1 activity.(**B**)GABARAPs positively regulate ULK1 activity and enhance the expression level of ATG13. Individual untagged GABARAPs were stably expressed in GABARAP TKO HeLa cells and cultured in full medium or starved with EBSS for 60 min. (**C**)Depletion of GABARAPs individually does not affect ULK1 activity. Wild-type (WT) or HCT116 cells depleted of GABARAP, GABARAPL1, or GABARAPL2 (KO) were treated as described in (B). *non-specific band. (**D**)LC3B and LC3C negatively regulate ULK1 activity. Individual untagged LC3s were stably expressed in LC3 TKO HeLa cells and were treated as described in (B). Two independent experiments (exp2 and exp3) were conducted, and the results were used for quantification in Figure 2E. (**E**) Depletion of LC3B does not affect the activity of ULK1. HCT116 cells depleted of LC3B were treated as described in (B). (**F**)Depletion of LC3C does not affect the activity of ULK1. HCT116 cells depleted of LC3C were treated as described in (B).(**G**) Confirmation of LC3C KO by sequencing. Due to the lack of LC3C-specific antibodies commercially available, the LC3C depletion was confirmed by DNA sequencing of the mutated genomic region. Sequence profiles show frame shift-causing deletion mutations for both alleles of the *LC3C* locus. (**H**) The effects of LC3B and LC3C on the protein expression of GABARAPs (Figure 2C) do not correlate with changes in mRNA levels of GABARAPs. The mRNA levels were quantified by qPCR and normalized to the level in WT cells. RNAs were prepared from the indicated cells in the fed condition. Mean and standard error were obtained from three repeats of experiments.

**Figure S2**

**Figure S2.** GABARAPs are important for ULK1 puncta formation during starvation. (**A**) Validation of anti-ULK1 antibody to detect ULK1 puncta. Wild type (WT) or ULK1-depleted (KO) HCT116 cells were cultured in full medium (fed) or EBSS (starved) for 60 min. Endogenous ULK1 (red) was detected by immunostaining using the anti-ULK1 antibody (Santa Cruz Biotechnology, sc-390904). The absence of ULK1 in ULK1 KO cells was previously verified by western blotting (Park et al. 2016) [1]. Immunostaining using the antibody showed some non-specific staining in the nucleus in the KO cells, whereas no cytoplasmic staining was detected in the KO cells. Nuclei were stained with DAPI (blue). Scale bar: 10 μm. (**B**) Validation that the anti-ULK1 antibody is specific to ULK1 colocalizing with ATG13. WT cells were treated the same as in (A), except ATG13 (green) was also detected by co-immunostaining using anti-ATG13 antibody (Cell Signaling Technology, 13468). The anti-ATG13 antibody has been validated to be specific to ATG13 [1]. Images for (A) and (B) were non-deconvolved. (**C**) GABARAPs are important for starvation-induced ULK1 puncta. WT or the indicated ATG8 KO HeLa cells were starved with EBSS for 60 min. Endogenous ULK1 was detected as described in (A). Note: for visual clarity, non-specific nuclear staining was removed using ImageJ from these images and ULK1-stained images hereafter. (**D**) Quantitative analysis of (C). Red bars are mean +/- SEM (*****p*<0.0001; Student t-test, n > 35). (**E**)GABARAPs are important for autophagic degradation of SQSTM1. WT, LC3 TKO, or GABARAP TKO HeLa cells were cultured in full medium or EBSS for 3 h in the presence or absence of 100 nM bafilomycin A1 (BAFA1).

**Figure S3**

**Figure S3.** Confirmation of ULK1 LIR genomic mutation and demonstration that ATG8 binding to ULK1 is not required for ULK1-ATG13 or ATG13-ATG14 interactions. (**A** and **B**)Sequence profiles demonstrating that the ULK1 LIR motif is mutated in the genome of HCT116 cells (A) and HEK293T cells (B). (**C**) ATG8 binding to ULK1 is important for ULK1 activation in response to starvation in HEK293T cells. WT or ULK1 LIR mutant HEK293T cells were cultured in full medium or EBSS for 1 h. (**D**) Disruption of the ULK1-ATG8 interaction does not alter the integrity of the ULK1 complex. ULK1 was isolated from wild type (WT) or ULK1 LIR mutant (mut) HCT116 cells by immunoprecipitation using anti-ULK1 antibody (Santa Cruz Biotechnology, sc-10900). The levels of the indicated proteins co-immunoprecipitated with ULK1 were analyzed by WB. (**E**) Disruption of the ULK1-ATG8 interaction does not alter the interaction between ATG13 and ATG14. Wild type or ULK1 LIR mutant HCT116 cells were treated with the crosslinker DSP (dithiobis[succinimidyl propionate]) at the indicated concentrations for 10 min prior to collecting whole cell lysates. ATG14 was immunoprecipitated using anti-ATG14 antibody (Santa Cruz Biotechnology, sc-164767). ATG13 co-immunoprecipitated with ATG14 was analyzed by WB.

**Figure S4**

**Figure S4.** ATG8 binding to ULK1 is important for starvation-induced ULK1 puncta formation.(**A**) ATG8 binding to ULK1 is important for starvation-induced ULK1 puncta. Wild type (WT) or ULK1 LIR mutant (LIRmut) HCT116 cells were cultured in full medium or starved with EBSS for 60 min. Endogenous ULK1 (red) was detected by immunostaining using the anti-ULK1 antibody (Santa Cruz Biotechnology, sc-390904). Scale bar: 10 μm.(**B**) Quantitative analysis of (A). Red bars are mean +/- SEM (**p* < 0.05; *****p*<0.0001; Student t-test, n ≥ 50). (**C**) ATG8 binding to ULK1 suppresses GABARAPL1-II formation. WT or ULK1 LIR mutant cells were cultured in full medium or starved with EBSS for 60 min.

**Figure S5**

**Figure S5.** ATG8 binding to ATG13, but not RB1CC1, is important for autophagy. (**A**)Sequence profile demonstrating that the RB1CC1/FIP200 LIR motif is mutated in the genome of HCT116 cells. (**B**)ATG8 binding to RB1CC1 is not required for ULK1 puncta formation during starvation. Wild type (WT) or RB1CC1 LIR mutant HCT116 cells were cultured in full medium or EBSS for 60 min. Endogenous ULK1 (red) was detected by immunostaining using the anti-ULK1 antibody (Santa Cruz Biotechnology, sc-390904). Scale bar: 10 μm.(**C**) Quantitative analysis of (B). Red bars are mean +/- SEM (N.S., not significant; Student t-test, n ≥ 40). (**D**) ATG8 binding to RB1CC1 is not important for the autophagic degradation of SQSTM1 and autophagic flux of LC3B. Wild type (WT) or RB1CC1 LIR mutant (mut) cells were cultured in full medium or EBSS for 4 h in the presence or absence of bafilomycin A1 (BAFA1) at 100 nM.(**E**)Verification that the ATG13 LIR mutation disrupts its binding to ATG8s. MYC-tagged wild type (wt) or LIR mutant (mut) ATG13 were transiently expressed in HEK293T cells with HA-tagged GABARAP, GABARAPL1, or GABARAPL2. HA-ATG8s were immunoprecipitated with anti-HA antibody and MYC-ATG13 co-immunoprecipitated with HA-ATG8s was analyzed by WB. (**F**) ATG8 binding to ATG13 is important for starvation-induced formation of LC3B puncta. Scale bar: 10 μm.(**G**) ATG8 binding to ATG13 is not required for the interaction between ULK1 and ATG13. MYC-tagged WT or LIR mutant ATG13 were transiently expressed in HEK293T cells with HA-tagged ULK1 and GABARAP. MYC-ATG13 was immunoprecipitated with anti-MYC antibody, and HA-ULK1 and HA-GABARAP co-immunoprecipitated with MYC-ATG13 were analyzed by WB. (**H**) ATG8 binding to ATG13 is not required for the ATG13-ATG14 interaction. MYC-tagged WT or LIR mutant ATG13 were transiently expressed in HEK293T cells with HA-ATG14. MYC-ATG13 was immunoprecipitated with anti-MYC antibody, and HA-ATG14 co-immunoprecipitated with MYC-ATG13 was analyzed by WB.

**Supplemental Tables**

**Table S1.** gRNA sequences for CRISPR-cas9 constructs to generate KO cells and LIRmutations.

*ATG7* KO: AGAAGAAGCTGAACGAGTAT

*LC3B* KO: TTCAAGCAGCGCCGCACCTT

*LC3C* KO: GCGTCAGACCCTTCAAGCAG

*ULK1* LIR: TGACACAGACGACTTCGTCA

*RB1CC1* LIR: GTATGTGCATCAATACTATC

**Table S2.** TALEN target sequences to generate KO cells.

*GABARAP*: T GTCCAGCCCGGTTCCC gggaggatgaagtt CGTGTACAAAGAAGAGC A

*GABARAPL1*: T GCATCATGAAGTTCCA gtacaaggaggacca TCCCTTTGAGTATCGGAA A

*GABARAPL2*: T TCCGTCCCCTTCCCGCCG ccgccatgaagtgg ATGTTCAAGGAGGACC A

*ATG13*: TCCCTTCTTGCTATAA ctagggtgacaccag CCTATAGGCTCTCCAGGA

**Table S3.** Primers for genotype screening of LIR mutations.

*ULK1* LIR WT: FWD: CTGTGACACAGACGACTTCG

REV: CCCATCCTAACTGCCCATAA

*ULK1* LIR MUT: FWD: CTGTGACACAGACGcagc

REV: CCCATCCTAACTGCCCATAA

*RB1CC1* LIR WT: FWD: CGTTTGATTTTGAAACTATTCCC

REV: ACCATCATTTCTGGGCTTTG

*RB1CC1* LIR MUT: FWD: GTTTGcTgcTGAAACTgcc

REV: ACCATCATTTCTGGGCTTTG

**Table S4.** Primers to amplify mutagenized regions to clone into pRK5 for sequencing.

*ULK1* LIR: FWD, GAGCGAGTCGACCAATTTGCTCCCCTGAGTGTG

REV, GTCTCGAAGCGGCCGCCCCATCCTAACTGCCCATAA

*RB1CC1* LIR: FWD, GAGCGAGTCGACTCCAGGCATCTGTGAGTCAG

REV, GTCTCGAAGCGGCCGCATCATTTCTGGGCTTTGTGG

*LC3C* KO: FWD, GAGCGAGTCGACGAGGAGAGGCCTGATGTCAC

REV, GTCTCGAAGCGGCCGCGGGATTTTGTTGGGGAACTT

**Table S5.** Primers for qPCR analysis of *GABARAP* gene expression.

*GABARAP* FWD: GGGTGCCGGTGATAGTAGAA

REV: AATTCGCTTCCGGATCAAG

*GABARAPL1* FWD: GGTCCCCGTGATTGTAGAGA

REV: GTCCTCAGGTCTCAGGTGGA

*GABARAPL2* FWD: CCGTCGTTGTTGTTGTGCT

REV: CATCTGTGTTCCAGCGAGTG

*GAPDH* FWD: GAGTCAACGGATTTGGTCGT

REV: TGGGTGGAATCATATTGGAA

**Table S6.** Primers for site-directed mutagenesis of the *ATG13* LIR.

*ATG13* LIR FWD: 5’GACTTTGTTATGGCGGCGTTTAAACCAGCT3’

*ATG13* LIR REV: 5’AGCTGGTTTAAACGCCGCCATAACAAAGTC3’

**Supplemental Materials and Methods**

All the sources of antibodies and chemicals and the experimental procedures used for the supplemental experiments are listed in Materials and Methods.

**Reference for Supplemental Information**

1. Park JM, Jung CH, Seo M, et al. The ULK1 complex mediates MTORC1 signaling to the autophagy initiation machinery via binding and phosphorylating ATG14. Autophagy. 2016 Mar 3;12(3):547-64.
